# Effects of Sorafenib on Intra-Tumoral Interstitial Fluid Pressure and Circulating Biomarkers in Patients with Refractory Sarcomas (NCI Protocol 6948)

Chandrajit P. Raut<sup>1,4\*</sup>, Yves Boucher<sup>2,4</sup>, Dan G. Duda<sup>2,4</sup>, Jeffrey A. Morgan<sup>3,4</sup>, Richard Quek<sup>3,4</sup><sup>‡a</sup>, Marek Ancukiewicz<sup>2,4</sup>, Johanna Lahdenranta<sup>2,4</sup>, J. Paul Eder<sup>3,4</sup><sup>‡b</sup>, George D. Demetri<sup>3,4</sup><sup>¶</sup>, Rakesh K. Jain<sup>2,4</sup><sup>¶</sup>

**1** Department of Surgery, Brigham and Women's Hospital and Dana-Farber Cancer Institute, Harvard Medical School, Boston, Massachusetts, United States of America, **2** Department of Radiation Oncology, Massachusetts General Hospital, Boston, Massachusetts, United States of America, **3** Department of Medical Oncology, Brigham and Women's Hospital and Dana-Farber Cancer Institute, Harvard Medical School, Boston, Massachusetts, United States of America, **4** Harvard Medical School, Boston, Massachusetts, United States of America

## Abstract

**Purpose:** Sorafenib is a multi-targeted tyrosine kinase inhibitor with therapeutic efficacy in several malignancies. Sorafenib may exert its anti-neoplastic effect in part by altering vascular permeability and reducing intra-tumoral interstitial hypertension. As correlative science with a phase II study in patients with advanced soft-tissue sarcomas (STS), we evaluated the impact of this agent on intra-tumor interstitial fluid pressure (IFP), serum circulating biomarkers, and vascular density.

**Patients and Methods:** Patients with advanced STS with measurable disease and at least one superficial lesion amenable to biopsy received sorafenib 400 mg twice daily. Intratumoral IFP and plasma and circulating cell biomarkers were measured before and after 1–2 months of sorafenib administration. Results were analyzed in the context of the primary clinical endpoint of time-to-progression (TTP).

**Results:** In 15 patients accrued, the median TTP was 45 days (range 14–228). Intra-tumoral IFP measurements obtained in 6 patients at baseline showed a direct correlation with tumor size. Two patients with stable disease at two months had post-sorafenib IFP evaluations and demonstrated a decline in IFP and vascular density. Sorafenib significantly increased plasma VEGF, PlGF, and SDF1 $\alpha$  and decreased sVEGFR-2 levels. Increased plasma SDF1 $\alpha$  and decreased sVEGFR-2 levels on day 28 correlated with disease progression.

**Conclusions:** Pretreatment intra-tumoral IFP correlated with tumor size and decreased in two evaluable patients with SD on sorafenib. Sorafenib also induced changes in circulating biomarkers consistent with expected VEGF pathway blockade, despite the lack of more striking clinical activity in this small series.

**Trial Registration:** ClinicalTrials.gov NCT00330421

**Citation:** Raut CP, Boucher Y, Duda DG, Morgan JA, Quek R, et al. (2012) Effects of Sorafenib on Intra-Tumoral Interstitial Fluid Pressure and Circulating Biomarkers in Patients with Refractory Sarcomas (NCI Protocol 6948). PLoS ONE 7(2): e26331. doi:10.1371/journal.pone.0026331

**Editor:** Sujit Basu, Ohio State University, United States of America

**Received:** July 26, 2011; **Accepted:** September 24, 2011; **Published:** February 7, 2012

**Copyright:** © 2012 Raut et al. This is an open-access article distributed under the terms of the Creative Commons Attribution License, which permits unrestricted use, distribution, and reproduction in any medium, provided the original author and source are credited.

**Funding:** This work was partially supported by the National Institutes of Health grants P01CA80124, R01CA115767 and Federal Share Proton Beam Income (RKJ) and U01CA062490 (JPE). The funders had no role in study design, data collection and analysis, decision to publish, or preparation of the manuscript. No additional external funding was received for this study.

**Competing Interests:** Chandrajit P. Raut is a Novartis - Honorarium. Johanna Lahdenranta has an employment/leadership position at Merrimack Pharmaceuticals. J. Paul Eder is currently employed at AstraZeneca PLC. George D. Demetri is a Consultant for Novartis, Pfizer, Ariad, Johnson & Johnson, Genentech, Infinity Pharmaceuticals, ZioPharm, Alnylam, Idera, Momenta Pharma, EMD-Serono, Glaxo Smith Kline, Amgen, Daiichi-Sankyo, ArQule, Enzon, Millenium/Takeda, PamGene (no compensation), Plexxikon, N-of-One (no compensation), Champions Biotechnology, and Kolltan Pharmaceuticals; on the Scientific Advisory Board of ZioPharm, PamGene, Plexxikon, N-of-One, Kolltan Pharmaceuticals (chair); on the Medical Advisory Board at Kolltan Pharmaceuticals (chair); an Honorarium at Novartis and Pfizer; provides research support (to Dana-Farber Cancer Institute for clinical trial) at Novartis, Pfizer, Ariad, Johnson & Johnson, Bristol-Myers Squibb, Infinity Pharmaceuticals, and Daiichi-Sankyo; and has equity (minor stake, non-public) at PamGene, Plexxikon, N-of-One, Champions Biotechnology, and Kolltan Pharmaceuticals. Rakesh K. Jain has a Consultant/advisory role at Millenium, Dyax, AstraZeneca, Regeneron, Astellas-Fibrogen, MorphoSys AG, Genzyme, SynDevRx, and Noxxon; is Honoraria at Pfizer and Genzyme (honoraria for lecture); provides research funding/contracted research at Dyax, AstraZeneca and MedImmune; and has ownership interest in SynDevRx. There are no patents or products in development or marketed products to declare. This does not alter the authors' adherence to all the PLoS ONE policies on sharing data and materials. Yves Boucher, Dan G. Duda, Jeffrey A. Morgan, Richard Quek and Marek Ancukiewicz declare no competing interest.

\* E-mail: craut@partners.org

¶ These authors contributed equally to this work.

‡ These authors also contributed equally to this work.

‡a Current address: National Cancer Centre Singapore, Singapore, Singapore

‡b Current address: Since the study: AstraZeneca PLC, Boston, Massachusetts, United States of America

## Introduction

The bi-aryl urea sorafenib was initially developed as an inhibitor of *c-raf* and mutant (V599E) *b-raf* *in vitro* [1]. The *ras/raf* signaling pathway is an important mediator of responses to growth signals and angiogenic factors. However, sorafenib also inhibits several receptor tyrosine kinases that may be involved in tumor angiogenesis and progression, e.g., human and murine vascular endothelial growth factor receptor-2 (VEGFR-2), VEGFR-3, platelet-derived growth factor receptor-beta (PDGFR- $\beta$ ), Flt3, and c-KIT [2,3,4]. Indeed, in human tumor xenografts, sorafenib induced a dramatic reduction in tumor neovascularization. These data suggest that sorafenib may have antineoplastic activity through multiple mechanisms, directly by targeting cell proliferation/survival dependent on activation of the MAPK pathway and by inhibiting tumor angiogenesis through inhibition of VEGFR-2, VEGFR-3, and/or PDGFR- $\beta$ . Sorafenib has been approved by the United States Food and Drug Administration for the treatment of patients with renal cell carcinoma and hepatocellular carcinoma, and it remains under investigation in several other solid tumors and hematologic malignancies.

Studies from our group and others have shown that the intra-tumoral interstitial fluid pressure (IFP) in human sarcomas, melanomas, and carcinomas (including colon, breast, lung, head and neck, cervix) is significantly higher than in normal tissues [5,6,7,8,9,10,11,12,13,14,15,16,17]. Increased permeability of blood vessels, impaired interstitial and lymphatic drainage, and compression of blood vessels by tumor cells growing in a confined space are major causes of intra-tumoral interstitial hypertension [18]. VEGF and PDGF signaling pathways have previously been etiologically related to tumor interstitial hypertension. Antibody blockade of VEGFR-2 reduces both tumor vascular permeability and IFP and increases both the transvascular pressure gradient and penetration of small tracers into solid tumors [19,20]. Similarly, the inhibition of PDGF signaling (by DNA aptamers, imatinib, etc.) may reduce tumor IFP, increase tumor uptake of chemotherapy agents, and enhance their therapeutic effects [21,22,23]. However, responses to antiangiogenic agents are invariably transient, and the escape mechanisms remain elusive [24].

Using study drug supplied by the NCI Cancer Therapy Evaluation Program (CTEP), we conducted a phase II trial of sorafenib in patients with advanced soft tissue sarcomas (STS), with the aim of exploring whether sorafenib administration is associated with mechanistically-related changes in intra-tumoral IFP and vascular density as well as circulating biomarkers of angiogenesis.

## Methods

### Trial Design

The protocol for this trial and supporting CONSORT checklist are available as supporting information; see Checklist S1 and Protocol S1. This phase II study (Figure 1) was approved by the Institutional Review Board of the Dana-Farber/Harvard Cancer Center for patients with metastatic or inoperable soft tissue sarcomas with no available curative or definitive survival-prolonging palliative therapy. Additional eligibility criteria included: at least one site of measurable disease by radiologic imaging, at least one superficial palpable tumor (>1 cm) with no overlying viscera amenable to biopsy, age  $\geq$  18 years, Eastern Cooperative Oncology Group (ECOG) performance status  $\leq$  2, and no prior sorafenib therapy. Written informed consent was obtained from all

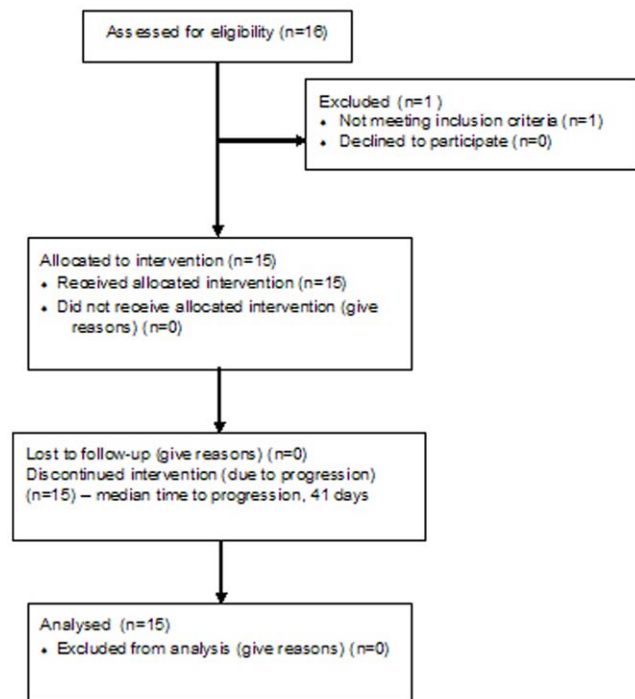

**Figure 1. Flow Diagram.**

doi:10.1371/journal.pone.0026331.g001

study participants. Sorafenib was administered at 400 mg twice daily continuously in cycles arbitrarily denoted as 28 days in length.

### Data Acquisition

Evaluations included physical examination, laboratory data, documentation of ECOG performance status, CT or MRI imaging (at the discretion of the treating physicians), and electrocardiogram. Each of these evaluations was performed prior to initial sorafenib administration, every one to four weeks (depending on cycle) while on study, and one month after the last dose of sorafenib was administered. Imaging was performed every other month while on study. Adverse events and toxicities were assessed on schedule every one to four weeks (depending on cycle) and one month after the last dose of sorafenib was administered. Pharmacokinetic data were measured on days 28 and 56.

### Evaluation of Biomarkers

**Histology.** Biopsies were available from 3 patients at baseline and after 28 or 56 days of sorafenib therapy. Five  $\mu$ m-thick sections were cut from the formalin-fixed, paraffin embedded blocks and a double immunostaining procedure was performed with CD31 (Dako N1596, Carpinteria, CA) and  $\alpha$ -smooth muscle actin ( $\alpha$ -SMA; Dako M0850) antibodies. In brief, the CD31 antibody was incubated at room temperature for 1 hour. Slides were then washed and incubated in secondary antibody (DAKO EnVision anti-mouse, K4007) for 30 min and developed with DAB. Slides were then blocked with EnVision doublestain block for 5 min and incubated overnight with the  $\alpha$ -SMA antibody. After washes, slides were incubated in secondary antibody (DAKO Doublestain AP Polymer) for 30 min, washed, and developed with Fast Red. Slides were counterstained with hematoxylin and coverslipped with Faramount. To determine the percentage of

proliferating cancer cells, immunostaining was also performed with a Ki67 antibody (Dako N1633).

**Circulating Biomarkers.** Peripheral blood was collected in EDTA-containing vacutainers from patients enrolled in this study at baseline (prior to sorafenib administration) and 28 days following the first dose of sorafenib. Blood was available from 14 patients at baseline and 10 patients at 28 days. Plasma analysis was carried out for circulating VEGF, placental growth factor (PIGF), soluble VEGFR-1 (sVEGFR-1), basic fibroblast growth factor (bFGF), interleukin-1 $\beta$  (IL-1 $\beta$ ), IL-6, IL-8, and tumor necrosis factor-alpha (TNF- $\alpha$ ) using multiplex ELISA plates from Meso-Scale Discovery, as well as for sVEGFR-2 and stromal cell-derived factor-1-alpha (SDF1 $\alpha$ ) using kits from R&D Systems [25]. Every sample was run in duplicate. Blood-circulating CD34<sup>+</sup>CD45<sup>dim</sup> progenitor cells (CPCs) and VEGFR-2<sup>+</sup>CD45<sup>+</sup> monocytes were enumerated in fresh samples using a standard flow cytometry protocol [26]. The quantitative analysis endpoint was the change in the fraction of CPCs or VEGFR-2<sup>+</sup> monocytes within the mononuclear blood cell population after sorafenib treatment. Percent values were obtained pre-treatment and at day 28 after the first dose of sorafenib.

**Intra-Tumoral IFP.** Intra-tumoral IFP was measured intra-operatively as previously described [9] prior to administration of the first dose of sorafenib and, in the absence of progression or drug intolerance, repeated on study day 28 or 56. In brief, to measure IFP, a 23-gauge needle with a 2 mm side hole at 5 mm from the tip was used. Nylon filaments (6-0 Ethilon) were placed in the needle. To take the pressure measurements, the needle and tubing filled with sterile heparinized saline were connected to a disposable pressure transducer and an electronic data acquisition and recording system (AdInstruments Inc, Colorado Springs, CO). The needle and tubing were gas sterilized before use. The calibration of the pressure transducer was verified by applying pressures of 10, 20, and 40 mm Hg before each IFP measurement. With the patient in supine position, the needle was inserted into the tumor center and the IFP was recorded. Stable pressure measurements with a good fluid communication between the tumor interstitial space and needle were considered valid. The IFP was measured in 2 to 3 different locations within the tumor. All IFP measurements were performed in superficial tumors under local anesthetic.

## Data and Statistical Analyses

The correlative scientific endpoints of this trial included measurements of changes in circulating biomarkers and IFP, radiographic responses, toxicity, and pharmacokinetics. The primary clinical endpoint was time-to-progression (TTP), measured from date of registration to date of radiographic progression. Response and progression were evaluated using the Response Evaluation Criteria in Solid Tumors (RECIST) [27]. Radiographic response was defined as percentage change in tumor size.

Biomarker changes from baseline were tested using the exact paired Wilcoxon test [28]. Missing measurements were excluded from analysis. In exploratory studies, we tested the correlation of baseline biomarker or biomarker changes at day 28 with pre-treatment tumor size, best tumor response (SD), or radiographic tumor response (as ordinal variables) using Kendall's  $\tau$ <sub>B</sub> coefficients [29].

## Results

### Demographic Data and Clinical Effects of Sorafenib

Patient and tumor characteristics are listed in **Table 1**. Fourteen of 15 patients (93.3%) had received prior chemotherapy

**Table 1.** Clinical characteristics.

| Patient characteristics                 | Number (%)                    |
|-----------------------------------------|-------------------------------|
| Median age                              | 59 years (range, 30–84 years) |
| Sex                                     |                               |
| Male                                    | 9 (60)                        |
| Female                                  | 6 (40)                        |
| ECOG* Performance Status                |                               |
| 0                                       | 8 (53.3)                      |
| 1                                       | 7 (46.7)                      |
| Histology                               |                               |
| Angiosarcoma                            | 1 (6.7)                       |
| Desmoplastic small round cell tumor     | 1 (6.7)                       |
| Gastrointestinal stromal tumor          | 1 (6.7)                       |
| Leiomyosarcoma                          | 4 (26.7)                      |
| Liposarcoma                             | 1 (6.7)                       |
| Malignant diffuse-type giant cell tumor | 1 (6.7)                       |
| Malignant peripheral nerve sheath tumor | 1 (6.7)                       |
| Malignant phyllodes tumor               | 1 (6.7)                       |
| Myxofibrosarcoma                        | 2 (13.3)                      |
| Synovial sarcoma                        | 2 (13.3)                      |
| Primary site                            |                               |
| Upper extremity                         | 1 (6.7)                       |
| Lower extremity                         | 1 (6.7)                       |
| Trunk                                   | 12 (80.0)                     |
| Pelvis                                  | 1 (6.7)                       |

\*ECOG, Eastern Cooperative Oncology Group.  
doi:10.1371/journal.pone.0026331.t001

and/or radiation therapy. No patients experienced a complete or partial radiographic response by RECIST. Stable disease (SD) was observed in 8 patients (53%) for a median 72 days (range 45–228 days). Progressive disease was observed as the “best response” in the remaining 7 patients (47%). Median TTP for the entire cohort was 45 days (range 14 to 228 days). Clinical outcomes did not appear to correlate with any specific histology; the 4 patients with TTP>80 days had 4 different sarcoma histologies (desmoplastic small round cell tumor, leiomyosarcoma, myxofibrosarcoma, and synovial sarcoma).

### Safety

Adverse events probably or definitely related to treatment are listed in **Table 2**. No Grade 4 toxicities were noted. The most commonly observed adverse events were hand-foot syndrome (7 patients), fatigue (3), mucositis/stomatitis (4), and hypertension (3) (**Table 2**). Of note, sorafenib administration transiently increased the number of red blood cells and blood hemoglobin at day 14 (**Table S1**).

### Analyses of Circulating Biomarkers

As a mechanistic pharmacodynamic assessment of sorafenib administration, we measured circulating levels of angiogenic biomarkers before and after sorafenib dosing, compared baseline biomarker levels with baseline tumors characteristics, and correlated baseline biomarker levels or changes in biomarker levels with radiographic responses. Sorafenib treatment induced significant increases in plasma circulating VEGF, PIGF, IL-8, and

**Table 2.** Adverse events after sorafenib treatment in advanced soft tissue sarcoma patients: number of episodes/number of affected patients (percentage).

| Toxicity                  | Grade 1 (%) | Grade 2 (%) | Grade 3 (%) | Grade 4 (%) | Any Grade (%) |
|---------------------------|-------------|-------------|-------------|-------------|---------------|
| Hand-foot syndrome        | 13/6 (40.0) | 5/2 (13.3)  | 3/3 (20.0)  | 0           | 21/7 (46.7)   |
| Rash/desquamation         | 4/1 (6.7)   | 2/1 (6.7)   | 3/1 (6.7)   | 0           | 8/1 (6.7)     |
| Fatigue                   | 5/3 (20.0)  | 0           | 0           | 0           | 5/3 (20.0)    |
| Mucositis/stomatitis      | 5/4 (26.7)  | 0           | 0           | 0           | 5/4 (26.7)    |
| Hypertension              | 2/2 (13.3)  | 0           | 2/1 (6.7)   | 0           | 4/3 (20.0)    |
| Extremity pain            | 4/1 (6.7)   | 0           | 0           | 0           | 4/1 (6.7)     |
| Erythema multiforme       | 2//1 (6.7)  | 1/1 (6.7)   | 0           | 0           | 3/2 (13.3)    |
| Skin – other              | 2/2 (13.3)  | 0           | 1/1 (6.7)   | 0           | 3/2 (13.3)    |
| Hemoglobin                | 0           | 2/1 (6.7)   | 0           | 0           | 2/1 (6.7)     |
| Anorexia                  | 2/1 (6.7)   | 0           | 0           | 0           | 2/1 (6.7)     |
| Bilirubin                 | 2/1 (6.7)   | 0           | 0           | 0           | 2/1 (6.7)     |
| Oral cavity – pain        | 2/1 (6.7)   | 0           | 0           | 0           | 2/1 (6.7)     |
| Platelets                 | 1/1 (6.7)   | 0           | 0           | 0           | 1/1 (6.7)     |
| Fever without neutropenia | 1/1 (6.7)   | 0           | 0           | 0           | 1/1 (6.7)     |
| Alopecia                  | 1/1 (6.7)   | 0           | 0           | 0           | 1/1 (6.7)     |
| Pruritis                  | 0           | 1/1 (6.7)   | 0           | 0           | 1/1 (6.7)     |
| Dehydration               | 0           | 0           | 1/1 (6.7)   | 0           | 1/1 (6.7)     |
| Diarrhea                  | 0           | 1/1 (6.7)   | 0           | 0           | 1/1 (6.7)     |
| Alkaline phosphatase      | 1/1 (6.7)   | 0           | 0           | 0           | 1/1 (6.7)     |
| Muscle - pain             | 1/1 (6.7)   | 0           | 0           | 0           | 1/1 (6.7)     |

doi:10.1371/journal.pone.0026331.t002

SDF1 $\alpha$  and decreases in sVEGFR2, but not other angiogenic and inflammatory biomarkers (bFGF, sVEGFR-1, TNF- $\alpha$ , IL-6, CPCs or VEGFR-2<sup>+</sup> monocytes) (**Table 3** and not shown). IL-1 $\beta$  concentration was undetectable in the majority of plasma samples. Higher baseline plasma concentration of IL-6 correlated with

larger baseline tumor size ( $p < 0.05$ , **Table 4**). Lower baseline plasma PIGF levels correlated with improved radiographic response after sorafenib dosing ( $p < 0.05$ , **Table 4**). With respect to biomarkers that changed after one cycle of sorafenib (day 28), the decrease in plasma sVEGFR-2 correlated with both SD and trend toward improved radiographic response, and the increase in plasma SDF1 $\alpha$  correlated with worse radiographic tumor response ( $p < 0.05$ ; **Table 4**). In the samples from patients with SD who were on-study and evaluable at 56 days, there were no statistically significant differences in the measured biomarkers, likely due to the small sample size ( $n = 4$ ; data not shown).

**Table 3.** Plasma biomarker concentration (pg/ml) before (pre-treatment) and after 28 days after sorafenib treatment.

| Plasma Biomarker      | Pre-Treatment       | Day 28              | P-value |
|-----------------------|---------------------|---------------------|---------|
|                       | (N = 14)            | (N = 10)            |         |
| VEGF                  | 140 [87,161]        | 214 [154,311]       | 0.002   |
| bFGF (pg/ml)          | 36 [19,68]          | 29 [15,86]          | 0.19    |
| PIGF                  | 22 [17,34]          | 52 [40,62]          | 0.002   |
| sVEGFR-1 (pg/ml)      | 112 [99,142]        | 83 [66,93]          | 0.38    |
| sVEGFR-2              | 6212 [5826–7207]    | 4781 [3942–5484]    | 0.002   |
| SDF1 $\alpha$         | 2306 [2218,2582]    | 2705 [2531,3472]    | 0.0039  |
| IL-6 (pg/ml)          | 5.8 [3.9,17.2]      | 12 [5,33]           | 0.13    |
| IL-8                  | 5.7 [4.3,14.5]      | 7.1 [5.6,22.2]      | 0.0059  |
| TNF- $\alpha$ (pg/ml) | 9.2 [7.4,11.8]      | 9.2 [7.4,14.8]      | 0.11    |
| CPCs (% of PBMCs)     | 0.050 [0.030,0.074] | 0.057 [0.029,0.075] | 0.20    |

Data are shown as medians and interquartile ranges (in square brackets) compared to baseline levels. P-values are from Wilcoxon test. VEGF, vascular endothelial growth factor; bFGF, basic fibroblast growth factor; PIGF, placental growth factor; sVEGFR-1, soluble VEGF receptor-1; sVEGFR-2, soluble VEGF receptor-2; SDF1 $\alpha$ , stromal cell-derived factor-1-alpha; IL-6, interleukin-6; IL-8, interleukin-8; TNF- $\alpha$ , tumor necrosis factor-alpha, CPCs, circulating progenitor cells; PBMC, peripheral blood mononuclear cells. doi:10.1371/journal.pone.0026331.t003

### Vascular Density and Maturation and Cancer Cell Proliferation

To identify blood vessels and perivascular cells in tumor sections, we performed a double immunostaining procedure with antibodies against CD31 and  $\alpha$ -SMA, respectively. In the biopsies of 2 patients, the decrease in vessel density was 59% and 83%, respectively, after sorafenib treatment (**Figure 2** and **Table 5**). The fraction of  $\alpha$ -SMA-positive vessels in these 2 patients was 48% and 64%, respectively, before sorafenib treatment, and sorafenib generally reduced the fraction of both  $\alpha$ -SMA-negative and -positive vessels (**Table 5**). With sorafenib treatment, there was a trend towards greater reduction in  $\alpha$ -SMA-negative than  $\alpha$ -SMA-positive vessels (**Table 5**). In a third patient the vessel density was relatively low in the pretreatment biopsies, and increased by approximately 50% after sorafenib (**Table 5**). In 2 patients with sufficient tissue available in both pre- and post-sorafenib biopsies, we also quantified the number of proliferating cancer cells. Sorafenib decreased the percentage of proliferating cancer cells (Ki67-positive) by 27% and 36%, respectively.

**Table 4.** Analysis of correlation between baseline biomarker and biomarker change at day 28 with (i) pre-treatment tumor size, (ii) best tumor response, and (iii) radiographic tumor response after sorafenib treatment in advanced STS patients (Kendall's  $\tau\beta$  with 95% CI).

| Kendall's $\tau\beta$                                        | Pre-Treatment Size | Response (SD)       | Radiographic Response |
|--------------------------------------------------------------|--------------------|---------------------|-----------------------|
| <b>Baseline IFP (N = 6)<sup>1</sup></b>                      | 0.87 [0.56,1.17]   | -0.43 [-0.91,0.05]  | -0.20 [-0.63,0.23]    |
| P-value                                                      | 0.017              | 0.40                | 0.82                  |
| <b>Baseline IL-6 (N = 14)<sup>1</sup></b>                    | 0.42 [0.10,0.74]   | 0.11 [-0.23,0.45]   | 0.09 [-0.36,0.54]     |
| P-value                                                      | 0.037              | 0.70                | 0.74                  |
| <b>Baseline PIGF (N = 14)<sup>1</sup></b>                    | 0.31 [-0.03,0.65]  | -0.39 [-0.64,-0.14] | -0.61 [-0.94,-0.27]   |
| P-value                                                      | 0.12               | 0.11                | 0.0054                |
| <b>Change in sVEGFR-2 (N = 10)<sup>2</sup></b>               | N/A                | 0.62 [0.37,0.87]    | 0.56 [0.31,0.80]      |
| P-value                                                      |                    | 0.033               | 0.029                 |
| <b>Change in SDF1<math>\alpha</math> (N = 9)<sup>2</sup></b> | N/A                | -0.47 [-0.77,-0.17] | -0.56 [-1.04,-0.07]   |
| P-value                                                      |                    | 0.17                | 0.045                 |

<sup>1</sup>Data are shown as Kendall's  $\tau\beta$  with approximate 95% confidence intervals between baseline biomarkers and tumor size or outcome measures, with P-value from Kendall's test.

<sup>2</sup>Data are shown as Kendall's  $\tau\beta$  with approximate 95% confidence intervals between day 28 to baseline ratios of biomarkers and outcome measures, with P-value from Kendall's test.

SD, stable disease; IFP, interstitial fluid pressure; IL-6, interleukin-6; PIGF, placental growth factor; sVEGFR-2, soluble vascular endothelial growth factor receptor-2; SDF1 $\alpha$ , stromal cell-derived factor-1-alpha.

doi:10.1371/journal.pone.0026331.t004

### Interstitial Fluid Pressure

IFP measurements were obtained in 6 patients at baseline. The IFP in the 6 lesions varied between 2.5 and 21.0 mm Hg and showed a direct correlation with tumor size (Kendall's tau = 0.87,  $p = 0.017$ , **Table 4**). Only 2 of these 6 patients had SD at 28 and 56 days. Thus, corresponding post-sorafenib IFP evaluation was only performed in these 2 patients. In both, a decline in IFP was observed. Tumor IFP decreased from 17.0 to 11.5 mm Hg in one patient and from 3.0 to 0.0 mm Hg in the other. The decrease in tumor IFP in these 2 patients was associated with a reduction in vascular density.

### Discussion

Studying the physiologic and pharmacodynamic impact of mechanistically-targeted drugs is a key aspect of rational therapeutic development and optimization. This study was designed to assess several mechanism-based correlative studies along with standard clinical outcomes. In this cohort of patients with multi-drug refractory STS of varied histologies, sorafenib administration was associated with modest radiographic effects,

with a median TTP of 45 days. In a recent study of 145 patients with recurrent or metastatic sarcoma of various histologies treated with sorafenib, RECIST complete or partial responses were observed in five patients with angiosarcoma and one with leiomyosarcoma [30].

While radiographic response criteria have been recently refined [31], they still do not have the sensitivity to detect accurately the more subtle responses which reflect the anti-neoplastic and anti-angiogenic effects of targeted therapies. A set of blood circulating pro-angiogenic and pro-inflammatory molecules are often elevated in patients with tumors and are currently being evaluated as potential biomarkers of response or resistance to treatments such as anti-VEGF therapy [24]. Consistent with the anti-VEGF activity of sorafenib—and in agreement with data from trials in hepatocellular carcinoma patients of another anti-VEGFR TKI sunitinib—treatment increased the plasma concentration of VEGF and PIGF, decreased sVEGFR-2, and increased erythropoiesis [24,32] [33]. More recently, corroborative data from over 700 patients with renal cell carcinoma in a phase III placebo-controlled randomized trial of sorafenib confirmed that sorafenib therapy increased VEGF and decreased sVEGFR-2 levels [34].

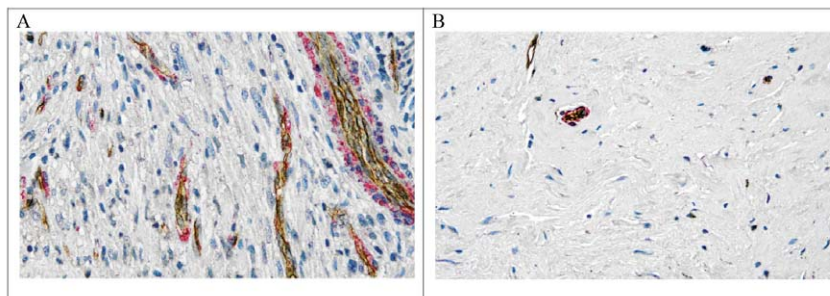

**Figure 2. Sorafenib reduces the vessel density in sarcoma lesions.** Immunostaining of CD31-positive (brown) or CD31 and  $\alpha$ -SMA-positive (brown and pink) tumor vessels before (A) and 28 days after (B) the initiation of sorafenib treatment. Sections were counterstained with hematoxylin. Note the reduced vessel density and cellular content in the sorafenib-treated lesion.

doi:10.1371/journal.pone.0026331.g002

**Table 5.** Vascular Density.

| Patient      | Vessels/field | CD31+/ $\alpha$ -SMA+ | CD31+/ $\alpha$ -SMA– |
|--------------|---------------|-----------------------|-----------------------|
|              |               | vessels per field     | vessels per field     |
| Pt#1/Day 0   | 6.9           | 3.3                   | 3.6                   |
| Pt#1/Day 28  | 1.2           | 0.8                   | 0.4                   |
| Pt#5/Day 0   | 15.9          | 10.1                  | 5.8                   |
| Pt#5/Day 56  | 6.5           | 4.4                   | 2.1                   |
| Pt#13/Day 0  | 1.2           | 0.7                   | 0.5                   |
| Pt#13/Day 28 | 1.9           | 1.7                   | 0.2                   |

doi:10.1371/journal.pone.0026331.t005

Soluble VEGFR-2 concentration has been previously proposed as a “pharmacodynamic biomarker” for agents with anti-VEGFR-2 TKI activity [24]. Indeed, a greater decrease in plasma sVEGFR-2 correlated with better radiographic response and SD in this study.

Interestingly, we also found significant associations between cytokines that may mediate resistance to anti-VEGF therapy and response: a lower baseline plasma PIGF concentration correlated with a better radiographic response after treatment at day 28, whereas an increase in SDF1 $\alpha$  by day 28, correlated with a worse radiographic response after treatment at day 28. The risk of false positive correlations is high given the multiple comparisons and the small sample size. However, it is notable that the same correlations have been seen with other anti-VEGF agents in patients with brain, rectal, and liver cancer (for plasma SDF1 $\alpha$ ), and in patients with brain, rectal and ovarian cancer (for plasma PIGF) [32,35,36,37,38,39].

The sorafenib-induced stabilization of tumor growth in human carcinoma xenografts in mice is associated with a decrease in vascular density [4,40,41]. Similarly in two sarcoma patients with stable disease, we found that sorafenib reduced tumor vessel density and IFP. These findings are consistent with sorafenib inhibition of VEGF signaling. We have previously shown that VEGF inhibition by bevacizumab significantly reduces the vascular density and IFP in rectal carcinoma patients [19]. Because VEGF signaling inhibition also reduces the leakiness of tumor vessels, the decrease in IFP may be caused by a reduction in vascular permeability [20]. Sorafenib inhibition of PDGF signaling could also lead to a reduction in IFP.

## References

- Peng CL, Guo W, Ji T, Ren T, Yang Y, et al. (2009) Sorafenib induces growth inhibition and apoptosis in human synovial sarcoma cells via inhibiting the RAF/MEK/ERK signaling pathway. *Cancer Biol Ther* 8: 1729–1736.
- Flaherty KT (2007) Sorafenib: delivering a targeted drug to the right targets. *Expert Rev Anticancer Ther* 7: 617–626.
- Adnane L, Trail PA, Taylor I, Wilhelm SM (2006) Sorafenib (BAY 43-9006, Nexavar), a dual-action inhibitor that targets RAF/MEK/ERK pathway in tumor cells and tyrosine kinases VEGFR/PDGFR in tumor vasculature. *Methods Enzymol* 407: 597–612.
- Wilhelm SM, Carter C, Tang L, Wilkie D, McNabola A, et al. (2004) BAY 43-9006 exhibits broad spectrum oral antitumor activity and targets the RAF/MEK/ERK pathway and receptor tyrosine kinases involved in tumor progression and angiogenesis. *Cancer Res* 64: 7099–7109.
- Gutmann R, Leunig A, Leunig M, Feyh J (1993) [Importance of increased interstitial fluid pressure in therapy of malignant tumors of the head-neck area]. *Laryngorhinootologie* 72: 338–341.
- Tufto I, Rofstad EK (1998) Interstitial fluid pressure, fraction of necrotic tumor tissue, and tumor cell density in human melanoma xenografts. *Acta Oncol* 37: 291–297.
- Tufto I, Rofstad EK (1999) Interstitial fluid pressure and capillary diameter distribution in human melanoma xenografts. *Microvasc Res* 58: 205–214.
- Yeo SG, Kim JS, Cho MJ, Kim KH (2009) Interstitial fluid pressure as a prognostic factor in cervical cancer following radiation therapy. *Clin Cancer Res* 15: 6201–6207.
- Boucher Y, Kirkwood JM, Opacic D, Desantis M, Jain RK (1991) Interstitial hypertension in superficial metastatic melanomas in humans. *Cancer Res* 51: 6691–6694.
- Boucher Y, Leunig M, Jain RK (1996) Tumor angiogenesis and interstitial hypertension. *Cancer Res* 56: 4264–4266.
- Less JR, Posner MC, Boucher Y, Borochovitz D, Wolmark N, et al. (1992) Interstitial hypertension in human breast and colorectal tumors. *Cancer Res* 52: 6371–6374.
- Nathan SS, DiResta GR, Casas-Ganem JE, Hoang BH, Sowers R, et al. (2005) Elevated physiologic tumor pressure promotes proliferation and chemosensitivity in human osteosarcoma. *Clin Cancer Res* 11: 2389–2397.
- Nathan SS, Huvos AG, Casas-Ganem JE, Yang R, Linkov I, et al. (2009) Tumour interstitial fluid pressure may regulate angiogenic factors in osteosarcoma. *Ann Acad Med Singapore* 38: 1041–1047.
- Stohrer M, Boucher Y, Stangassinger M, Jain RK (2000) Oncotic pressure in solid tumors is elevated. *Cancer Res* 60: 4251–4255.
- Roh HD, Boucher Y, Kalnicki S, Buchsbaum R, Bloomer WD, et al. (1991) Interstitial hypertension in carcinoma of uterine cervix in patients: possible

## Conclusion

Sorafenib shows modest clinical activity in patients with advanced refractory STS. Biomarker changes were consistent with inhibition of angiogenesis by sorafenib, including a mechanism-based decrease in the baseline high levels of intratumoral IFP. Preliminary circulating biomarker data from this study suggest a potential biomarker value for sVEGFR-2, PIGF, and SDF1 $\alpha$ . Tumor IFP and vessel density appear to decrease when response is maintained. The findings of this hypothesis-generating study should be validated in large prospective trials of sorafenib, alone or in combination with other agents, in sarcoma and other cancers.

## Supporting Information

**Table S1 Changes in number of circulating red blood cells and hemoglobin after sorafenib treatment in advanced STS patients (median values with interquartile range; P value from Wilcoxon test, compared to pretreatment values).**

(DOCX)

**Checklist S1 CONSORT Checklist.**

(DOCM)

**Protocol S1 Trial Protocol.**

(PDF)

## Acknowledgments

The authors thank the Cancer Therapeutics Evaluation Program for their support, C. Koppel, K. Kinzel, and S. Roberge for expert technical support for biomarker analyses, Q. Wang for statistical support regarding clinical data, and nurses and physicians at our institutions for their assistance.

Data were presented at the American Society of Clinical Oncology Annual Meeting, June 4–8, 2010, Chicago, IL.

## Author Contributions

Conceived and designed the experiments: CPR YB DGD JAM JPE GDD RKJ. Performed the experiments: CPR YB DGD MA JL JPE RKJ. Analyzed the data: CPR YB DGD JAM RQ MA JL GDD RKJ. Contributed reagents/materials/analysis tools: CPR YB DGD JAM RQ MA JL JPE GDD RKJ. Wrote the paper: CPR YB DGD MA GDD RKJ.

- correlation with tumor oxygenation and radiation response. *Cancer Res* 51: 6695–6698.
16. Boucher Y, Salehi H, Witwer B, Harsh GR, Jain RK (1997) Interstitial fluid pressure in intracranial tumours in patients and in rodents. *Br J Cancer* 75: 829–836.
  17. Milosevic M, Fyles A, Hedley D, Pintilie M, Levin W, et al. (2001) Interstitial fluid pressure predicts survival in patients with cervix cancer independent of clinical prognostic factors and tumor oxygen measurements. *Cancer Res* 61: 6400–6405.
  18. Jain RK (2005) Normalization of tumor vasculature: an emerging concept in antiangiogenic therapy. *Science* 307: 58–62.
  19. Willett CG, Boucher Y, di Tomaso E, Duda DG, Munn LL, et al. (2004) Direct evidence that the VEGF-specific antibody bevacizumab has antivascular effects in human rectal cancer. *Nat Med* 10: 145–147.
  20. Tong RT, Boucher Y, Kozin SV, Winkler F, Hicklin DJ, et al. (2004) Vascular normalization by vascular endothelial growth factor receptor 2 blockade induces a pressure gradient across the vasculature and improves drug penetration in tumors. *Cancer Res* 64: 3731–3736.
  21. Ogawa Y, Kawamura T, Furuhashi M, Tsukamoto K, Shimada S (2008) Improving chemotherapeutic drug penetration in melanoma by imatinib mesylate. *J Dermatol Sci* 51: 190–199.
  22. Pietras K, Ostman A, Sjoquist M, Buchdunger E, Reed RK, et al. (2001) Inhibition of platelet-derived growth factor receptors reduces interstitial hypertension and increases transcapillary transport in tumors. *Cancer Res* 61: 2929–2934.
  23. Heldin CH, Rubin K, Pietras K, Ostman A (2004) High interstitial fluid pressure - an obstacle in cancer therapy. *Nat Rev Cancer* 4: 806–813.
  24. Jain RK, Duda DG, Willett CG, Sahani DV, Zhu AX, et al. (2009) Biomarkers of response and resistance to antiangiogenic therapy. *Nat Rev Clin Oncol* 6: 327–338.
  25. Batchelor TT, Sorensen AG, di Tomaso E, Zhang WT, Duda DG, et al. (2007) AZD2171, a pan-VEGF receptor tyrosine kinase inhibitor, normalizes tumor vasculature and alleviates edema in glioblastoma patients. *Cancer Cell* 11: 83–95.
  26. Duda DG, Cohen KS, Scadden DT, Jain RK (2007) A protocol for phenotypic detection and enumeration of circulating endothelial cells and circulating progenitor cells in human blood. *Nat Protoc* 2: 805–810.
  27. Therasse P, Arbuck SG, Eisenhauer EA, Wanders J, Kaplan RS, et al. (2000) New guidelines to evaluate the response to treatment in solid tumors. European Organization for Research and Treatment of Cancer, National Cancer Institute of the United States, National Cancer Institute of Canada. *J Natl Cancer Inst* 92: 205–216.
  28. Hollander M, Wolfe DA (1973) *Nonparametrical Statistical Inference*. New York: John Wiley & Sons.
  29. Brown MB, Benedetti JK (1977) Sampling behavior of test for correlation in two-way contingency tables. *J Am Statistical Assoc* 72: 309–315.
  30. Maki RG, D'Adamo DR, Keohan ML, Saule M, Schuetze SM, et al. (2009) Phase II study of sorafenib in patients with metastatic or recurrent sarcomas. *J Clin Oncol* 27: 3133–3140.
  31. Eisenhauer EA, Therasse P, Bogaerts J, Schwartz LH, Sargent D, et al. (2009) New response evaluation criteria in solid tumours: revised RECIST guideline (version 1.1). *Eur J Cancer* 45: 228–247.
  32. Zhu AX, Raymond E (2009) Early development of sunitinib in hepatocellular carcinoma. *Expert Rev Anticancer Ther* 9: 143–150.
  33. Zhu AX, Duda DG, Ancukiewicz M, di Tomaso E, Clark JW, et al. (2011) Exploratory analysis of early toxicity of sunitinib in advanced hepatocellular carcinoma patients: kinetics and potential biomarker value. *Clin Cancer Res* 17: 918–927.
  34. Pena C, Lathia C, Shan M, Escudier B, Bukowski RM (2010) Biomarkers predicting outcome in patients with advanced renal cell carcinoma: Results from sorafenib phase III Treatment Approaches in Renal Cancer Global Evaluation Trial. *Clin Cancer Res* 16: 4853–4863.
  35. Willett CG, Duda DG, di Tomaso E, Boucher Y, Ancukiewicz M, et al. (2009) Efficacy, safety, and biomarkers of neoadjuvant bevacizumab, radiation therapy, and fluorouracil in rectal cancer: a multidisciplinary phase II study. *J Clin Oncol* 27: 3020–3026.
  36. Horowitz NS, Penson RT, Duda DG, di Tomaso E, Boucher Y, et al. (2011) Safety, Efficacy, and Biomarker Exploration in a Phase II Study of Bevacizumab, Oxaliplatin, and Gemcitabine in Recurrent Mullerian Carcinoma. *Clin Ovarian Cancer Other Gynecol Malig* 4: 26–33.
  37. Batchelor TT, Duda DG, di Tomaso E, Ancukiewicz M, Plotkin SR, et al. (2010) Phase II study of cediranib, an oral pan-vascular endothelial growth factor receptor tyrosine kinase inhibitor, in patients with recurrent glioblastoma. *J Clin Oncol* 28: 2817–2823.
  38. Gerstner ER, Eichler AF, Plotkin SR, Drappatz J, Doyle CL, et al. (2011) Phase I trial with biomarker studies of vatalanib (PTK787) in patients with newly diagnosed glioblastoma treated with enzyme inducing anti-epileptic drugs and standard radiation and temozolomide. *J Neurooncol* 103: 325–332.
  39. Duda DG, Kozin SV, Kirkpatrick ND, Xu L, Fukumura D, et al. (2011) CXCL12 (SDF1 $\alpha$ )-CXCR4/CXCR7 pathway inhibition: an emerging sensitizer for anticancer therapies? *Clin Cancer Res* 17: 2074–2080.
  40. Chang YS, Adnane J, Trail PA, Levy J, Henderson A, et al. (2007) Sorafenib (BAY 43-9006) inhibits tumor growth and vascularization and induces tumor apoptosis and hypoxia in RCC xenograft models. *Cancer Chemother Pharmacol* 59: 561–574.
  41. Wilhelm SM, Adnane L, Newell P, Villanueva A, Llovet JM, et al. (2008) Preclinical overview of sorafenib, a multikinase inhibitor that targets both Raf and VEGF and PDGF receptor tyrosine kinase signaling. *Mol Cancer Ther* 7: 3129–3140.
